# Supplementary material
Source: MDPI journal article supplement (https://www.mdpi.com/2079-6412/13/12/2083)

## Supporting Information

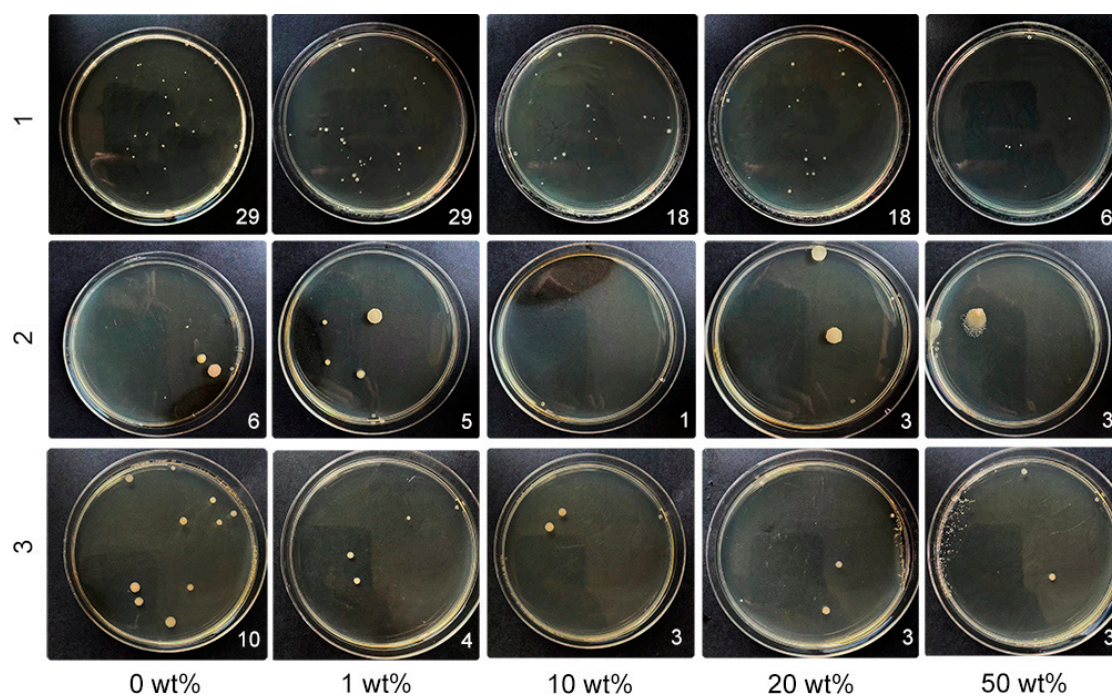

**Figure S1.** Bacterial colonies on the samples.

Supplement: s1 [file s1]
